# Supplementary material
Source: PubMed Central journal article supplement (PMC3754346)
Supplement: AAC.00709-13_zac999102098so1.pdf [file AAC.00709-13_zac999102098so1.pdf]

# Table S1. Primers used in this study

| Primer name | Sequence                | Source                            |
|-------------|-------------------------|-----------------------------------|
| rpsL-L      | ACGTGGCATGGAAATACTCC    | This study                        |
| rpsL-R      | AATTCGGCGTCCTCATATTG    |                                   |
| espa-F      | GCTGATGTTTCAGAGTAGC     | Abu-Ali <i>et al.</i><br>(2010)   |
| espa-R      | ATCACCCTAAGATCACG       |                                   |
| espb-F      | TCAGCATTGGGGATCTTAGG    |                                   |
| espb-R      | CTGCGACATCAGCAACTT      |                                   |
| rrsA-F      | CGGTGGAGCATGTGGTTTAA    | Kobayashi <i>et al.</i><br>(2006) |
| rrsA-R      | GAAAACCTCCGTGGATGTCAAGA |                                   |

**Abu-Ali GS, Ouellette LM, Henderson ST, Lacher DW, Riordan JT, Whittam TS, Manning SD.** 2010. Increased adherence and expression of virulence genes in a lineage of *Escherichia coli* O157:H7 commonly associated with human infections. *PLoS One* 5:e10167.

**Kobayashi A, Hirakawa H, Hirata T, Nishino K, Yamaguchi A.** 2006. Growth phase-dependent expression of drug exporters in *Escherichia coli* and its contribution to drug tolerance. *J. Bacteriol.* **188**:5693-5703.

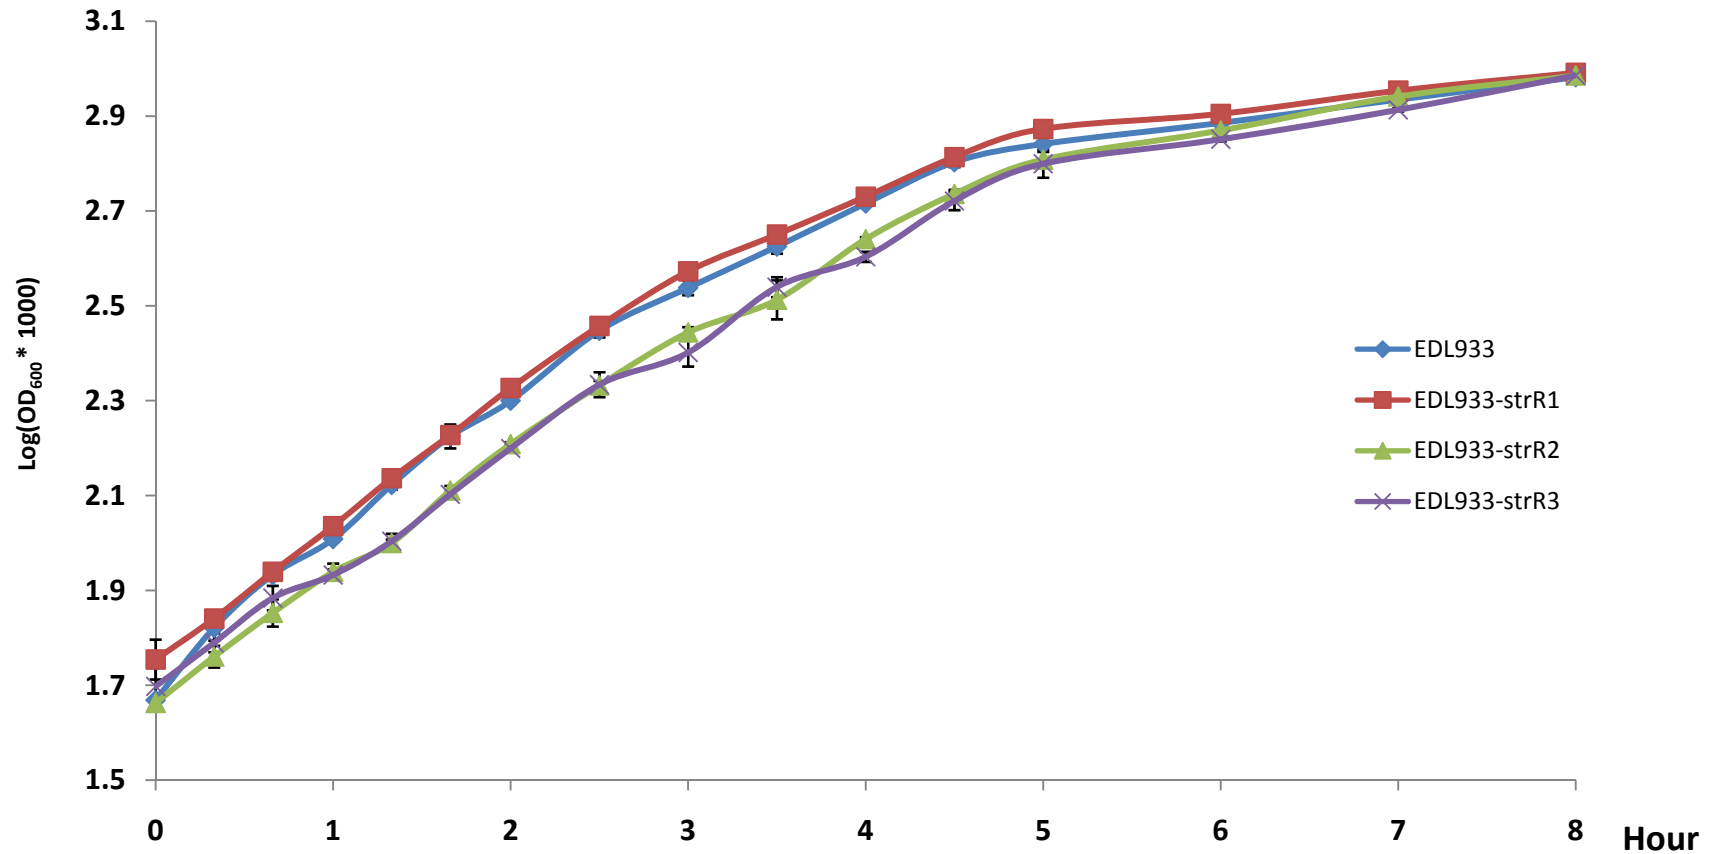

Figure S1. Growth curves of EDL933 and its Str<sup>r</sup> mutants in high-glucose DMEM. The strains were incubated statically for 8 hours and OD<sub>600</sub> was measured over the course. Data presented are averages from three biological repeats and error bars represent 1 standard deviation.
